# Supplementary material for: The Triple Helix model and the competence set: human spare parts industry under scrutiny
Source: Springer Nature journal article supplement (doi:10.1186/s40604-016-0038-5), 2016-07-25
Supplement: MOESM1 [file 11901896]

## Multilingual abstracts

### Arabic

نموذج المراوح الثلاثة وتحديد الاختصاص: صناعة الأعضاء البشرية تحت المجهر

الكاتب (ة) : Markku Sotarauta and Tuomo Heinonen

#### ملخص

تتمثل الأهداف الرئيسية لهذه الورقة في: (أ) صياغة نموذج مفاهيمي عام لنموذج " المراوح الثلاثة" استناداً إلى مجموعات الاختصاص، ومن ثم (ب) تحديد مستوى نظام الكفاءات العامة المطلوبة عند ظهور صناعة جديدة. كما تظهر هذه الورقة ضرورة التركيز على الكفاءات العامة المطلوبة للتفاعل بين المجالات المؤسسية الرئيسية حتى نضفي صبغة تحليلية إضافية على نموذج " المراوح الثلاثة". هناك إذا حاجة للتركيز على التفاعل والتضارب على مستوى نظام الكفاءات العامة التي تعزز أو تعيق عمليات الابتكار. نعتقد أن اعتماد الكفاءة هو جوهر كل مكونات نموذج " المراوح الثلاثة"، ولكن نعتقد أيضاً أن الكفاءات المختلفة تتجلى بطرق متنوعة حسب طبيعة نظام معين وحسب الصناعات المتصلة به. تم صياغة نموذج الكفاءات المطلوبة باستخدام ظهور صناعة الأعضاء البشرية في تام بيري، فنلندا كحالة توضيحية لتسليط الضوء ومناقشة مختلف الجوانب النظرية.
